# Supplementary material
Source: publisher site journal article supplement (https://natureconservation.pensoft.net/article/49478/download/suppl/31/)
Supplement: Supplementary file 1

**Supplementary Information**

Preliminary genetic assessment of wild and farmed

*Python regius* (Reptilia: Serpentes: Pythonidae) in Togo

Mark Auliya*, Sylvia Hofman*, Gabriel H. Segniagbeto, Délagnon Assou, Delphine Ronfot, Jonas Astrin, Sophia Forat, Guillaume Koffivi K. Ketoh, Neil D'Cruze

*These authors contributed equally to this work.

**Supplementary Table S1.** List of individual IDs, sample localities and GenBank accession numbers of COI sequences of *Python regius* samples used in this study.

| Sample ID | Locality | Lat | Long | COI |
| --- | --- | --- | --- | --- |
| MA_01 | Mare farm, Lomé | 6.19569 | 1.18439 | MN295674 |
| MA_02 | Mare farm, Lomé | 6.19569 | 1.18439 | MN295675 |
| MA_03 | Mare farm, Lomé | 6.19569 | 1.18439 | MN295676 |
| MA_04 | Mare farm, Lomé | 6.19569 | 1.18439 | MN295674 |
| MA_05 | Mare farm, Lomé | 6.19569 | 1.18439 | MN295674 |
| MA_06 | Adaptation farm, Lomé | 6.17355 | 1.16603 | MN295677 |
| MA_07 | Adaptation farm, Lomé | 6.17355 | 1.16603 | MN295674 |
| MA_08 | Adaptation farm, Lomé | 6.17355 | 1.16603 | MN295674 |
| MA_09 | Adaptation farm, Lomé | 6.17355 | 1.16603 | MN295675 |
| MA_10 | Adaptation farm, Lomé | 6.17355 | 1.16603 | MN295678 |
| MA_11 | Toganim farm, Lomé | 6.21839 | 1.20493 | MN295674 |
| MA_12 | Toganim farm, Lomé | 6.21839 | 1.20493 | MN295674 |
| MA_13 | Toganim farm, Lomé | 6.21839 | 1.20493 | MN295676 |
| MA_14 | Toganim farm, Lomé | 6.21839 | 1.20493 | MN295674 |
| MA_15 | Toganim farm, Lomé | 6.21839 | 1.20493 | MN295674 |
| MA_16 | Pajar farm, Lomé | 6.22525 | 1.21417 | MN295678 |
| MA_17 | Pajar farm, Lomé | 6.22525 | 1.21417 | MN295674 |
| MA_18 | Pajar farm, Lomé | 6.22525 | 1.21417 | MN295674 |
| MA_19 | Togo Exotic farm, Lomé | 6.17467 | 1.19536 | MN295676 |
| MA_20 | Togo Exotic farm, Lomé | 6.17467 | 1.19536 | MN295676 |
| MA_21 | Togo Exotic farm, Lomé | 6.17467 | 1.19536 | MN295676 |
| MA_22 | Tado | 7.14598 | 1.59158 | MN295676 |
| MA_23 | Tado | 7.14598 | 1.59158 | MN295674 |
| MA_24 | Tado | 7.14598 | 1.59158 | MN295674 |
| MA_25 | Tsevie | 6.41471 | 1.20582 | MN295674 |
| MA_26 | Tsevie | 6.41471 | 1.20582 | MN295675 |
| MA_27 | Tsevie | 6.41471 | 1.20582 | MN295679 |
| MA_28 | Agbave | 6.74836 | 0.75881 | MN295674 |
| MA_29 | Nyidove | 6.76062 | 0.71094 | MN295678 |
| MA_30 | Amoussoukope | 6.66381 | 0.84526 | MN295674 |
| MA_31 | Amoussoukope | 6.66381 | 0.84526 | MN295676 |
| MA_32 | Amoussoukope | 6.66381 | 0.84526 | MN295674 |
| MA_33 | Amoussoukope | 6.66381 | 0.84526 | MN295674 |
| MA_34 | Hangoume | 6.36763 | 1.61120 | MN295679 |
| MA_35 | Hangoume | 6.36763 | 1.61120 | MN295674 |
| MA_36 | Hangoume | 6.36763 | 1.61120 | MN295674 |
| MA_37 | Dagbati | 6.51028 | 1.48890 | MN295674 |
| MA_38 | Dagbati | 6.51028 | 1.48890 | MN295676 |
| MA_39 | Kpove | 6.95295 | 1.29809 | MN295677 |
| MA_40 | Kpove | 6.95295 | 1.29809 | MN295674 |
| MA_41 | Kpove | 6.95295 | 1.29809 | MN295674 |
| MA_42 | Assahoun | 6.45625 | 0.91300 | MN295674 |
| MA_43 | Assahoun | 6.45625 | 0.91300 | MN295678 |
| MA_44 | Ountivou | 7.36003 | 1.56770 | MN295674 |
| MA_45 | Ountivou | 7.36003 | 1.56770 | MN295676 |
| MA_46 | Ountivou | 7.36003 | 1.56770 | MN295674 |
| MA_47 | Ountivou | 7.36003 | 1.56770 | MN295680 |
| MA_48 | Ountivou | 7.36003 | 1.56770 | MN295674 |
| MA_49 | Ountivou | 7.36003 | 1.56770 | MN295677 |
| MA_50 | Zio | 6.29240 | 1.20258 | MN295681 |
| MA_51 | Zio | 6.29241 | 1.20259 | MN295675 |
| MA_52 | Zio | 6.29242 | 1.20260 | MN295674 |
| MA_53 | Zio | 6.29243 | 1.20261 | − |
| MA_54 | Zio | 6.29244 | 1.20262 | MN295674 |
| MA_55 | Zio | 6.29245 | 1.20263 | − |
| MA_56 | Zio | 6.29246 | 1.20264 | MN295674 |
| MA_57 | Zio | 6.29247 | 1.20265 | MN295674 |
| MA_58 | Zio | 6.29248 | 1.20266 | MN295674 |
| MA_59 | Zio | 6.29249 | 1.20267 | MN295674 |
| MA_60 | Zio | 6.29250 | 1.20268 | MN295674 |
| MA_61 | Aveta | 6.22512 | 1.34518 | MN295674 |
| MA_62 | Aveta | 6.22512 | 1.34518 | MN295682 |

**Supplementary Table S2.** Haplotype **(a)** and nucleotide **(b)** diversity difference between localities/ populations (below diagonal; p-values above diagonal) based on permutation tests, p-values ≤ 0.05 are indicated bold. Farms are treated as one locality, as are Agbave and Nyidove due to their short geographic distances to each other. Zio is the name of a district; the closest village sampled from in that district was Towouganou, see Fig. 2)

| (a) | F | H | D | T | A | AM | AN | K | Ta | O | Z | AV |
| --- | --- | --- | --- | --- | --- | --- | --- | --- | --- | --- | --- | --- |
| Farms [F] | -- | 0.905 | 0.813 | 0.424 | 0.813 | 0.572 | 0.818 | 0.907 | 0.903 | 0.638 | 0.212 | 0.816 |
| Hangoume [H] | 0.014 | -- | 0.450 | 0.354 | 0.446 | 0.903 | 0.450 | 1.000 | 1.000 | 0.642 | 0.451 | 0.448 |
| Dagbati [D] | 0.319 | 0.333 | -- | 1.000 | 1.000 | 0.622 | 1.000 | 0.443 | 0.451 | 0.783 | 0.299 | 1.000 |
| Tsevie [T] | 0.319 | 0.333 | 0.000 | -- | 1.000 | 0.367 | 1.000 | 0.353 | 0.359 | 0.549 | 0.163 | 1.000 |
| Assahoun [A] | 0.319 | 0.333 | 0.000 | 0.000 | -- | 0.619 | 1.000 | 0.453 | 0.447 | 0.787 | 0.291 | 1.000 |
| Amoussoukope [AM] | 0.181 | 0.167 | 0.500 | 0.500 | 0.500 | -- | 0.634 | 0.906 | 0.908 | 0.418 | 0.843 | 0.625 |
| Agbave, Nyidove [AN] | 0.319 | 0.333 | 0.000 | 0.000 | 0.000 | 0.500 | -- | 0.451 | 0.451 | 0.788 | 0.303 | 1.000 |
| Kpove [K] | 0.014 | 0.000 | 0.333 | 0.333 | 0.333 | 0.167 | 0.333 | -- | 1.000 | 0.648 | 0.453 | 0.453 |
| Tado [Ta] | 0.014 | 0.000 | 0.333 | 0.333 | 0.333 | 0.167 | 0.333 | 0.000 | -- | 0.651 | 0.457 | 0.454 |
| Ountivou [O] | 0.119 | 0.133 | 0.200 | 0.200 | 0.200 | 0.300 | 0.200 | 0.133 | 0.133 | -- | 0.174 | 0.785 |
| Zio [Z] | 0.264 | 0.250 | 0.583 | 0.583 | 0.583 | 0.083 | 0.583 | 0.250 | 0.250 | 0.383 | -- | 0.298 |
| Aveta [AV] | 0.319 | 0.333 | 0.000 | 0.000 | 0.000 | 0.500 | 0.000 | 0.333 | 0.333 | 0.200 | 0.583 | -- |

| **(b)** | F | H | D | T | A | AM | AN | K | Ta | O | Z | AV |
| --- | --- | --- | --- | --- | --- | --- | --- | --- | --- | --- | --- | --- |
| Farms [F] | -- | 0.910 | 0.915 | 0.673 | 0.091 | 0.592 | 0.083 | 0.911 | 0.449 | 0.891 | 0.082 | 0.143 |
| Hangoume [H] | 0.000 | -- | 0.930 | 0.744 | 0.211 | 0.647 | 0.200 | 1.000 | 0.404 | 0.854 | 0.329 | 0.316 |
| Dagbati [D] | 0.001 | 0.000 | -- | 0.864 | 0.271 | 0.671 | 0.268 | 0.927 | 0.479 | 0.817 | 0.362 | 0.502 |
| Tsevie [T] | 0.001 | 0.001 | 0.001 | -- | 0.270 | 0.484 | 0.268 | 0.743 | 0.261 | 0.653 | 0.184 | 0.437 |
| Assahoun [A] | 0.007 | 0.006 | 0.006 | 0.005 | -- | 0.052 | 1.000 | 0.205 | **0.042** | 0.083 | **0.007** | 0.655 |
| Amoussoukope [AM] | 0.001 | 0.002 | 0.002 | 0.003 | 0.008 | -- | **0.046** | 0.653 | 0.725 | 0.725 | 0.610 | 0.128 |
| Agbave, Nyidove [AN] | 0.007 | 0.006 | 0.006 | 0.005 | 0.000 | 0.008 | -- | 0.202 | **0.039** | 0.073 | **0.006** | 0.650 |
| Kpove [K] | 0.000 | 0.000 | 0.000 | 0.001 | 0.006 | 0.002 | 0.006 | -- | 0.402 | 0.853 | 0.324 | 0.318 |
| Tado [Ta] | 0.003 | 0.003 | 0.003 | 0.004 | 0.009 | 0.001 | 0.009 | 0.003 | -- | 0.528 | 0.929 | 0.097 |
| Ountivou [O] | 0.000 | 0.001 | 0.001 | 0.002 | 0.007 | 0.001 | 0.007 | 0.001 | 0.002 | -- | 0.271 | 0.175 |
| Zio [Z] | 0.003 | 0.003 | 0.004 | 0.004 | 0.010 | 0.002 | 0.010 | 0.003 | 0.000 | 0.003 | -- | **0.028** |
| Aveta [AV] | 0.005 | 0.005 | 0.004 | 0.004 | 0.001 | 0.007 | 0.001 | 0.005 | 0.008 | 0.006 | 0.008 | -- |

**Supplementary Table S3.** Pairwise FST-values between (A) all localities (farms and wild populations) and (B) between farms (n=5) treated as one locality and wild populations.FST-Values > 0 are indicated bold and grey-shaded. Forabbreviations of wild populations see Supplementary Table S2. Agbave and Nyidove (AN) are treated as one locality due to their short geographic distances to each other. F = farm; Togo Ex F = Togo Exotic Farm.

| **(A)** | Mare F | Adapt. F | Toganim F | Pajar F | TogoEx F | Ta | T | AN | AM | H | D | K | A | O |
| --- | --- | --- | --- | --- | --- | --- | --- | --- | --- | --- | --- | --- | --- | --- |
| Adaptation F [n=5] | 0.000 |  |  |  |  |  |  |  |  |  |  |  |  |  |
| Toganim F [n=5] | 0.000 | 0.000 |  |  |  |  |  |  |  |  |  |  |  |  |
| Pajar F [n=3] | 0.000 | 0.000 | 0.000 |  |  |  |  |  |  |  |  |  |  |  |
| TogoEx F [n=3] | 0.000 | 0.000 | **0.029** | 0.000 |  |  |  |  |  |  |  |  |  |  |
| Ta [n=3] | 0.000 | 0.000 | **0.032** | **0.069** | 0.000 |  |  |  |  |  |  |  |  |  |
| T [n=3] | 0.000 | 0.000 | 0.000 | 0.000 | 0.000 | **0.004** |  |  |  |  |  |  |  |  |
| AN [n=2] | 0.000 | 0.000 | 0.000 | 0.000 | 0.000 | 0.000 | 0.000 |  |  |  |  |  |  |  |
| AM [n=4] | 0.000 | 0.000 | 0.000 | 0.000 | **0.028** | **0.046** | 0.000 | 0.000 |  |  |  |  |  |  |
| H [n=3] | 0.000 | 0.000 | **0.002** | 0.000 | 0.000 | **0.006** | 0.000 | **0.019** | 0.000 |  |  |  |  |  |
| D [n=2] | 0.000 | 0.000 | 0.000 | 0.000 | 0.000 | 0.000 | 0.000 | 0.000 | 0.000 | 0.000 |  |  |  |  |
| K [n=3] | 0.000 | 0.000 | **0.072** | **0.077** | **0.046** | **0.032** | **0.020** | **0.064** | **0.082** | **0.016** | **0.010** |  |  |  |
| A [n=2] | **0.007** | 0.000 | **0.057** | 0.000 | 0.000 | **0.015** | **0.042** | **0.091** | **0.032** | **0.052** | 0.000 | **0.074** |  |  |
| O [n=6] | 0.000 | **0.011** | **0.056** | 0.000 | 0.000 | **0.051** | 0.000 | **0.049** | **0.007** | 0.000 | 0.000 | **0.003** | **0.075** |  |
| Z [n=11] | 0.000 | 0.000 | 0.000 | 0.000 | **0.004** | **0.072** | 0.000 | 0.000 | 0.000 | 0.000 | 0.000 | **0.085** | **0.012** | 0.000 |

| **(B)** | Farms | Ta | T | AN | AM | H | D | K | A | O |
| --- | --- | --- | --- | --- | --- | --- | --- | --- | --- | --- |
| Farms (n=5) |  |  |  |  |  |  |  |  |  |  |
| Ta | **0.001** |  |  |  |  |  |  |  |  |  |
| T | 0.000 | **0.004** |  |  |  |  |  |  |  |  |
| AN | 0.000 | 0.000 | 0.000 |  |  |  |  |  |  |  |
| AM | 0.000 | **0.046** | 0.000 | 0.000 |  |  |  |  |  |  |
| H | 0.000 | **0.006** | 0.000 | **0.019** | 0.000 |  |  |  |  |  |
| D | 0.000 | 0.000 | 0.000 | 0.000 | 0.000 | 0.000 |  |  |  |  |
| K | **0.042** | **0.032** | **0.020** | **0.064** | **0.082** | **0.016** | **0.010** |  |  |  |
| A | 0.000 | **0.015** | **0.042** | **0.091** | **0.032** | **0.052** | 0.000 | **0.074** |  |  |
| O | **0.006** | **0.051** | 0.000 | **0.049** | **0.007** | 0.000 | 0.000 | **0.003** | **0.075** |  |
| Z | 0.000 | **0.072** | 0.000 | 0.000 | 0.000 | 0.000 | 0.000 | **0.085** | **0.012** | **0.000** |

**Supplementary Table S4.** Probabilities of assignments for each individual from wild populations to each wild reference population based on eight loci using Bayesian method (Rannala and Mountain 1997). Agbave and Nyidove have been treated as one population due to close geographic proximity to each other (Fig. 3 and Fig. 4). Population abbreviation: Agbav = Agbave; Amous = Amoussoukope; Assah = Assahoun; Dagba = Dagbati; Hango = Hangoume; Nyido = Nyidove; Ounti = Ountivou; Tsevi = Tsevie; Zio = Zio is the district; the closest village sampled from in that district was Towouganou). Correct assignments with a probability >0.7 are indicated by green-shaded cells, those with a probability >0.6 by yellow-shaded cells.

| Assigned individuals | Tado | Tsevi | Nyido | Amous | Hango | Dagba | Kpove | Assah | Ounti | Zio |
| --- | --- | --- | --- | --- | --- | --- | --- | --- | --- | --- |
| Tado_MA22 | 0.878 | 0.017 | 0.089 | 0.111 | 0.018 | 0.214 | 0.093 | 0.141 | 0.204 | 0.203 |
| Tado_MA23 | 0.875 | 0.009 | 0.027 | 0.104 | 0.050 | 0.123 | 0.022 | 0.057 | 0.147 | 0.013 |
| Tado_MA24 | 0.881 | 0.146 | 0.038 | 0.316 | 0.035 | 0.443 | 0.082 | 0.010 | 0.235 | 0.074 |
| Tsevi_MA25 | 0.007 | 0.839 | 0.045 | 0.382 | 0.043 | 0.160 | 0.033 | 0.215 | 0.172 | 0.261 |
| Tsevi_MA26 | 0.084 | 0.780 | 0.038 | 0.384 | 0.163 | 0.152 | 0.158 | 0.035 | 0.743 | 0.783 |
| Tsevi_MA27 | 0.004 | 0.888 | 0.090 | 0.871 | 0.045 | 0.286 | 0.116 | 0.074 | 0.742 | 0.464 |
| Agbav_MA28 | 0.033 | 0.108 | 0.964 | 0.125 | 0.068 | 0.162 | 0.004 | 0.313 | 0.039 | 0.295 |
| Nyido_MA29 | 0.102 | 0.012 | 0.928 | 0.116 | 0.002 | 0.108 | 0.123 | 0.101 | 0.084 | 0.447 |
| Amous_MA31 | 0.052 | 0.076 | 0.029 | 0.801 | 0.029 | 0.147 | 0.020 | 0.005 | 0.113 | 0.080 |
| Amous_MA32 | 0.009 | 0.326 | 0.002 | 0.912 | 0.171 | 0.267 | 0.038 | 0.051 | 0.539 | 0.511 |
| Amous_MA33 | 0.003 | 0.316 | 0.042 | 0.869 | 0.016 | 0.198 | 0.191 | 0.076 | 0.435 | 0.169 |
| Hango_MA34 | 0.155 | 0.327 | 0.167 | 0.170 | 0.927 | 0.258 | 0.020 | 0.071 | 0.804 | 0.416 |
| Hango_MA35 | 0.010 | 0.054 | 0.013 | 0.156 | 0.737 | 0.084 | 0.065 | 0.017 | 0.054 | 0.064 |
| Hango_MA36 | 0.045 | 0.178 | 0.052 | 0.503 | 0.871 | 0.495 | 0.005 | 0.021 | 0.278 | 0.690 |
| Dagba_MA37 | 0.085 | 0.086 | 0.118 | 0.240 | 0.062 | 0.940 | 0.028 | 0.002 | 0.449 | 0.124 |
| Dagba_MA38 | 0.186 | 0.174 | 0.011 | 0.684 | 0.189 | 0.884 | 0.006 | 0.090 | 0.376 | 0.439 |
| Kpove_MA39 | 0.139 | 0.024 | 0.004 | 0.079 | 0.020 | 0.038 | 0.820 | 0.022 | 0.029 | 0.039 |
| Kpove_MA40 | 0.000 | 0.036 | 0.009 | 0.064 | 0.000 | 0.000 | 0.830 | 0.011 | 0.019 | 0.026 |
| Kpove_MA41 | 0.002 | 0.102 | 0.001 | 0.043 | 0.001 | 0.003 | 0.948 | 0.009 | 0.041 | 0.027 |
| Assah_MA42 | 0.022 | 0.026 | 0.040 | 0.060 | 0.004 | 0.021 | 0.009 | 0.891 | 0.026 | 0.065 |
| Assah_MA43 | 0.021 | 0.084 | 0.407 | 0.121 | 0.036 | 0.119 | 0.117 | 0.922 | 0.054 | 0.579 |
| Ounti_MA44 | 0.148 | 0.271 | 0.022 | 0.170 | 0.154 | 0.127 | 0.006 | 0.001 | 0.862 | 0.475 |
| Ounti_MA45 | 0.001 | 0.002 | 0.026 | 0.117 | 0.000 | 0.094 | 0.005 | 0.113 | 0.828 | 0.371 |
| Ounti_MA46 | 0.003 | 0.130 | 0.012 | 0.355 | 0.314 | 0.207 | 0.058 | 0.071 | 0.802 | 0.226 |
| Ounti_MA47 | 0.008 | 0.276 | 0.000 | 0.412 | 0.104 | 0.032 | 0.228 | 0.022 | 0.771 | 0.129 |
| Ounti_MA48 | 0.168 | 0.050 | 0.077 | 0.044 | 0.065 | 0.306 | 0.006 | 0.001 | 0.889 | 0.157 |
| Ounti_MA49 | 0.121 | 0.127 | 0.029 | 0.344 | 0.004 | 0.246 | 0.030 | 0.002 | 0.898 | 0.033 |
| Zio_MA50 | 0.003 | 0.437 | 0.007 | 0.197 | 0.047 | 0.240 | 0.054 | 0.013 | 0.208 | 0.427 |
| Zio_MA51 | 0.001 | 0.161 | 0.045 | 0.391 | 0.034 | 0.052 | 0.423 | 0.181 | 0.250 | 0.935 |
| Zio_MA52 | 0.012 | 0.101 | 0.015 | 0.276 | 0.243 | 0.167 | 0.010 | 0.100 | 0.458 | 0.694 |
| Zio_MA54 | 0.054 | 0.115 | 0.014 | 0.177 | 0.046 | 0.151 | 0.048 | 0.005 | 0.508 | 0.799 |
| Zio_MA57 | 0.033 | 0.030 | 0.109 | 0.117 | 0.033 | 0.191 | 0.037 | 0.111 | 0.019 | 0.664 |
| Zio_MA59 | 0.044 | 0.311 | 0.624 | 0.311 | 0.214 | 0.242 | 0.040 | 0.153 | 0.481 | 0.862 |
| Zio_MA60 | 0.013 | 0.231 | 0.244 | 0.429 | 0.072 | 0.204 | 0.022 | 0.656 | 0.470 | 0.857 |

**Supplementary Table S5.** Percentage of individuals from farms assigned to reference wild populations based on all loci using Bayesian method (Rannala and Mountain 1997), and resampling 10,000 simulated individuals. Assignment of samples with a probability >0.7 are indicated by green-shaded cells, those with >0.6 by yellow-shaded cells. For populations abbreviations see Supplementary Table S4. Farm abbreviations: AdapF = Adaptation Farm; MareF = Mare Farm; Pajar Farm; TogaF = Toganime Farm; TogoF = Togo Exotic Farm.

| Assigned individuals | Tado | Tsevi | Nyido | Amous | Hango | Dagba | Kpove | Assah | Ounti | Zio |
| --- | --- | --- | --- | --- | --- | --- | --- | --- | --- | --- |
| MareF_MA1 | 0.000 | 0.024 | 0.009 | 0.006 | 0.001 | 0.032 | 0.031 | 0.000 | 0.004 | 0.007 |
| MareF_MA2 | 0.037 | 0.140 | 0.026 | 0.195 | 0.104 | 0.083 | 0.093 | 0.052 | 0.138 | 0.110 |
| MareF_MA3 | 0.101 | 0.239 | 0.010 | 0.280 | 0.110 | 0.071 | 0.042 | 0.097 | 0.608 | 0.493 |
| MareF_MA4 | 0.358 | 0.053 | 0.265 | 0.113 | 0.068 | 0.272 | 0.175 | 0.043 | 0.058 | 0.381 |
| MareF_MA5 | 0.010 | 0.001 | 0.094 | 0.149 | 0.012 | 0.085 | 0.018 | 0.002 | 0.040 | 0.052 |
| AdapF_MA6 | 0.012 | 0.005 | 0.003 | 0.049 | 0.002 | 0.016 | 0.014 | 0.000 | 0.025 | 0.002 |
| AdapF_MA7 | 0.003 | 0.007 | 0.028 | 0.039 | 0.024 | 0.112 | 0.318 | 0.088 | 0.004 | 0.405 |
| AdapF_MA8 | 0.123 | 0.237 | 0.166 | 0.408 | 0.046 | 0.213 | 0.111 | 0.159 | 0.221 | 0.291 |
| AdapF_MA9 | 0.045 | 0.121 | 0.069 | 0.160 | 0.005 | 0.066 | 0.371 | 0.242 | 0.078 | 0.125 |
| AdapF_MA10 | 0.002 | 0.005 | 0.001 | 0.034 | 0.000 | 0.001 | 0.004 | 0.021 | 0.006 | 0.001 |
| TogaF_MA11 | 0.149 | 0.040 | 0.015 | 0.156 | 0.211 | 0.149 | 0.023 | 0.008 | 0.634 | 0.132 |
| TogaF_MA12 | 0.136 | 0.124 | 0.045 | 0.249 | 0.065 | 0.401 | 0.018 | 0.097 | 0.151 | 0.644 |
| TogaF_MA13 | 0.032 | 0.080 | 0.091 | 0.265 | 0.170 | 0.304 | 0.084 | 0.114 | 0.051 | 0.370 |
| TogaF_MA14 | 0.012 | 0.019 | 0.051 | 0.060 | 0.040 | 0.090 | 0.037 | 0.000 | 0.042 | 0.021 |
| TogaF_MA15 | 0.123 | 0.302 | 0.083 | 0.228 | 0.127 | 0.203 | 0.175 | 0.249 | 0.758 | 0.679 |
| PajaF_MA16 | 0.002 | 0.191 | 0.194 | 0.498 | 0.120 | 0.098 | 0.073 | 0.222 | 0.416 | 0.635 |
| PajaF_MA17 | 0.105 | 0.165 | 0.028 | 0.197 | 0.016 | 0.514 | 0.007 | 0.017 | 0.336 | 0.505 |
| PajaF_MA18 | 0.000 | 0.067 | 0.053 | 0.128 | 0.005 | 0.021 | 0.022 | 0.075 | 0.028 | 0.320 |
| TogoF_MA19 | 0.160 | 0.283 | 0.201 | 0.416 | 0.315 | 0.098 | 0.067 | 0.297 | 0.706 | 0.615 |
| TogoF_MA20 | 0.047 | 0.144 | 0.068 | 0.212 | 0.225 | 0.227 | 0.012 | 0.104 | 0.652 | 0.094 |
| TogoF_MA21 | 0.081 | 0.128 | 0.017 | 0.151 | 0.095 | 0.403 | 0.045 | 0.001 | 0.069 | 0.074 |


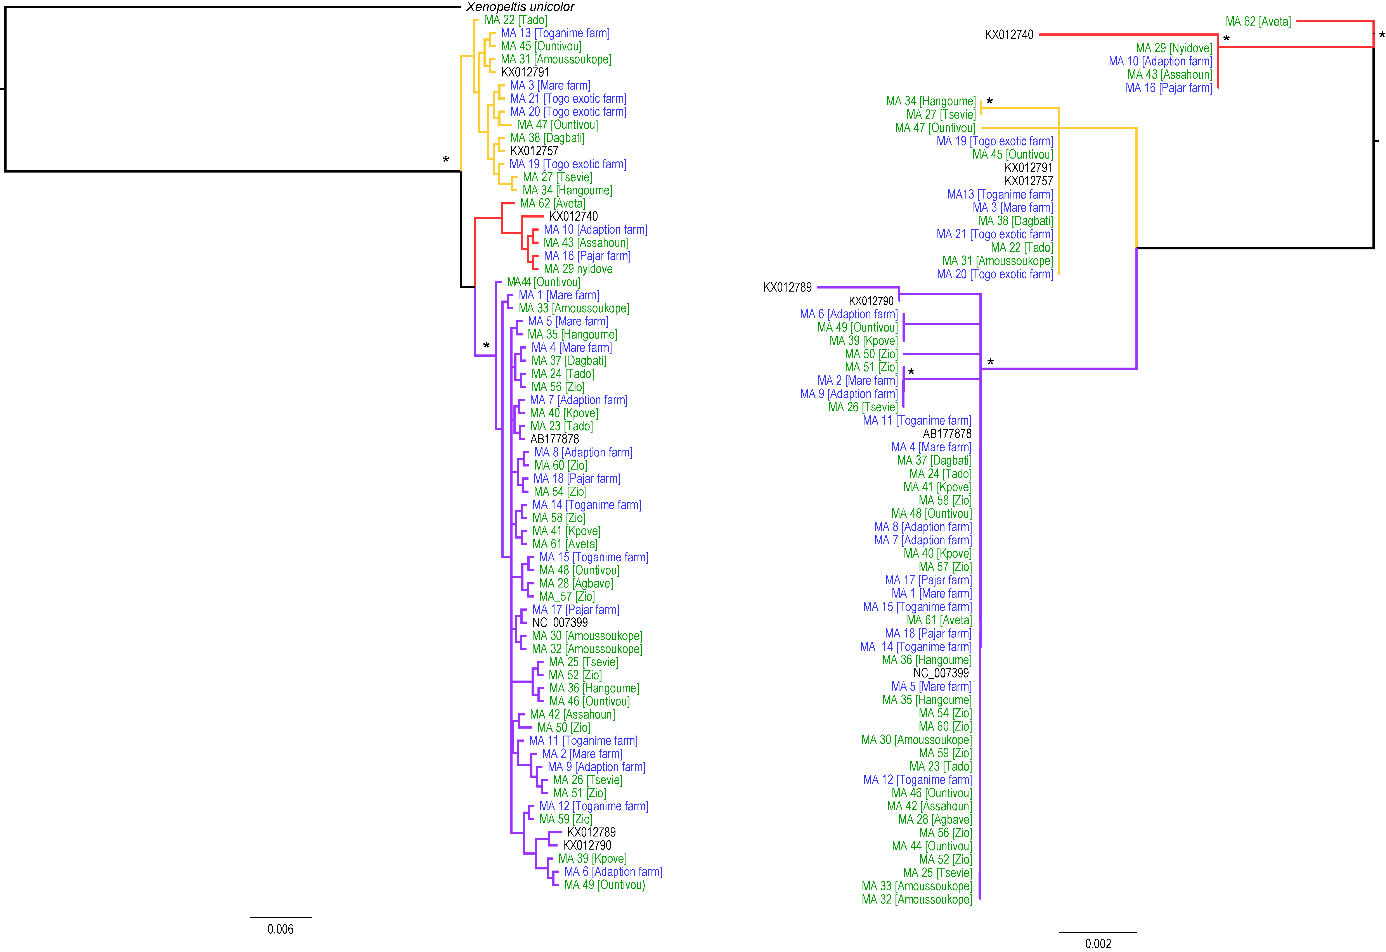


**Supplementary Figure S1.** Bayesian inference (BI) tree (left panel) and Maximum-likelihood (ML) tree (right panel; outgroup not shown in the ML tree) showing the three clades recovered in the phylogenetic analyses. An asterisk at nodes indicates bootstrap/posterior probability values of ≥70 and ≥0.95, respectively. Samples from wild populations are denoted in green, while samples from farms are in blue.

**
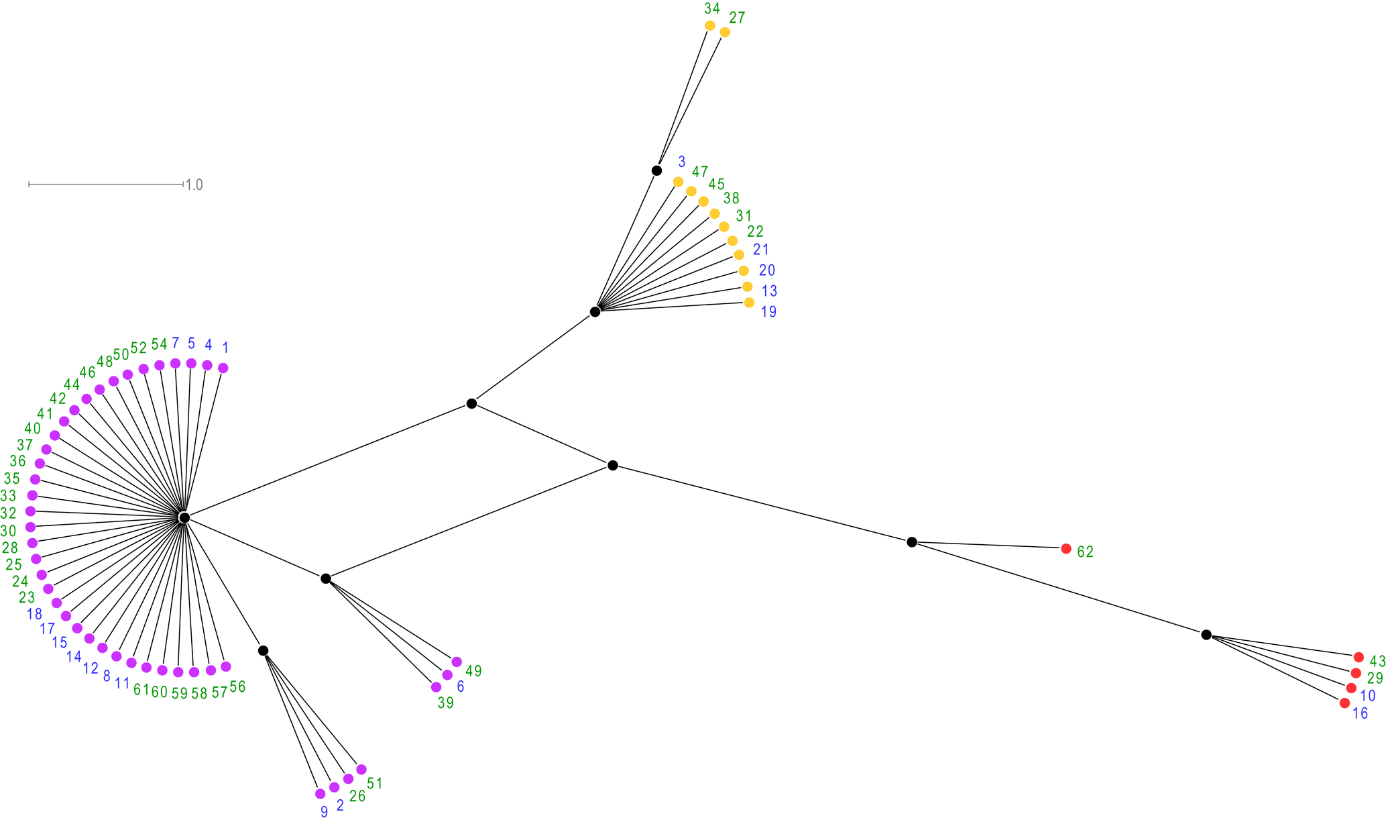
**

**Supplementary Figure S2.** Haplotype network for the localities/populations of *Python regius* from Togo obtained by SplitsTree using the median network algorithm based on the CO1 sequence data. Colour code corresponds to Supplementary Figure S1.
